# Supplementary material for: Transcriptional Profiling of Non-Small Cell Lung Cancer Cells with Activating EGFR Somatic Mutations
Source: PLoS One. 2007 Nov 21;2(11):e1226. doi: 10.1371/journal.pone.0001226 (PMC2080626; doi:10.1371/journal.pone.0001226)
Supplement: File S1 — Comparison of Gene Expression in EGFR-mutant and -wild-type NSCLC Cells. Genes listed were increased or decreased in EGFR-mutant NSCLC cell lines (n = 4) relative to that of EGFR wild-type cell lines (n = 3). (0.06 MB XLS) [file pone.0001226.s001.xls]

## Sheet: higher in EGFR_mut_cell_lines
Supplementary File 1A. Genes Expressed at Higher Levels in EGFR Mutant Cell Lines than in EGFR-Wild-Type Cell Lines.
Entrez.Gene	P value	FDR	Fold change: Mut/WT	Gene.Symbol	Gene.Title
23643	0.000371334	0.106252	42.5519	LY96	lymphocyte antigen 96
5920	0.0235185	0.393731	21.3328	RARRES3	retinoic acid receptor responder (tazarotene induced) 3
2152	0.00553475	0.259207	16.6623	F3	coagulation factor III (thromboplastin, tissue factor)
4680	0.000591659	0.124831	13.1603	CEACAM6	carcinoembryonic antigen-related cell adhesion molecule 6 (non-specific cross reacting antigen) /// carcinoembryonic antigen-related cell adhesion molecule 6 (non-specific cross reacting antigen)
226302_at	0.0438616	0.463071	10.1766	---	Transcribed locus
10457	0.019927	0.376377	9.99281	GPNMB	glycoprotein (transmembrane) nmb
217	0.00036752	0.105871	9.82669	ALDH2	aldehyde dehydrogenase 2 family (mitochondrial)
1557236_at	0.015819	0.353011	9.70358	---	---
241762_at	2.31873e-05	0.0392545	9.57012	---	---
254848	0.0495497	0.477328	9.2956	LOC254848	hypothetical protein LOC254848
221395	0.00300684	0.214166	8.76435	GPR116	G protein-coupled receptor 116
232060_at	0.0158539	0.35323	8.46846	---	Full-length cDNA clone CS0DD009YB17 of Neuroblastoma Cot 50-normalized of Homo sapiens (human)
7039	0.0060153	0.265887	7.48179	TGFA	transforming growth factor, alpha
3790	0.0485054	0.474823	7.25445	KCNS3	potassium voltage-gated channel, delayed-rectifier, subfamily S, member 3
389376	0.0143165	0.34321	7.25133	SFTPG	surfactant associated protein G
2123	0.000591536	0.124822	7.24827	EVI2A	ecotropic viral integration site 2A
3437	0.00947922	0.304678	6.91582	IFIT3	interferon-induced protein with tetratricopeptide repeats 3
9245	0.00130132	0.162978	6.89154	GCNT3	glucosaminyl (N-acetyl) transferase 3, mucin type
10202	0.00643416	0.271382	6.87722	DHRS2	dehydrogenase/reductase (SDR family) member 2
147372	0.00889441	0.299011	6.70734	CCBE1	collagen and calcium binding EGF domains 1
3433	0.0149691	0.347565	6.25155	IFIT2	interferon-induced protein with tetratricopeptide repeats 2
91624	0.000226967	0.0894001	6.24929	NEXN	nexilin (F actin binding protein)
6581	0.0227896	0.390397	6.19937	SLC22A3	solute carrier family 22 (extraneuronal monoamine transporter), member 3
26191	0.0187557	0.370153	5.65985	PTPN22	protein tyrosine phosphatase, non-receptor type 22 (lymphoid)
2069	0.0463168	0.469414	5.63371	EREG	Epiregulin
7851	0.0237009	0.394551	5.47252	MALL	mal, T-cell differentiation protein-like
1193	0.0114501	0.321936	5.4605	CLIC2	chloride intracellular channel 2
6376	0.00688275	0.27697	5.41109	CX3CL1	chemokine (C-X3-C motif) ligand 1
27242	0.0394964	0.450985	5.38898	TNFRSF21	tumor necrosis factor receptor superfamily, member 21
1848	0.0180849	0.366443	5.29047	DUSP6	dual specificity phosphatase 6
6337	0.000656084	0.129332	5.19221	SCNN1A	sodium channel, nonvoltage-gated 1 alpha
54809	0.00491766	0.249946	5.03908	SAMD9	sterile alpha motif domain containing 9
58472	0.0102804	0.312009	5.03212	SQRDL	sulfide quinone reductase-like (yeast)
23151	0.003047	0.215074	4.77539	DIP	death-inducing-protein
244350_at	0.0195092	0.374192	4.66851	---	---
7056	4.46173e-05	0.0498599	4.64271	THBD	thrombomodulin
286499	2.29451e-07	0.00703749	4.55353	RP1-32F7.2	hypothetical protein FLJ37659
132299	0.01886	0.37072	4.54574	OCIAD2	OCIA domain containing 2
4316	0.0380487	0.446719	4.51239	MMP7	matrix metallopeptidase 7 (matrilysin, uterine)
65987	0.00625865	0.269114	4.43511	KCTD14	potassium channel tetramerisation domain containing 14
116441	0.0429924	0.460751	4.37235	TM4SF18	transmembrane 4 L six family member 18
3575	0.00202323	0.188483	4.32331	IL7R	interleukin 7 receptor /// interleukin 7 receptor
130367	1.08208e-08	0.00222924	4.3043	SGPP2	Sphingosine-1-phosphate phosphotase 2
7057	0.000745091	0.135072	4.14066	THBS1	Thrombospondin 1
22943	0.00184053	0.182745	4.07529	DKK1	dickkopf homolog 1 (Xenopus laevis)
242979_at	0.0335962	0.432655	4.05827	---	Transcribed locus
2887	0.00273329	0.207733	4.05699	GRB10	growth factor receptor-bound protein 10
10437	0.00462056	0.245168	4.05135	IFI30	interferon, gamma-inducible protein 30
5743	0.0258703	0.403926	3.9922	PTGS2	prostaglandin-endoperoxide synthase 2 (prostaglandin G/H synthase and cyclooxygenase)
10723	0.0158903	0.353457	3.94445	SLC12A7	solute carrier family 12 (potassium/chloride transporters), member 7
1486	0.000614274	0.126448	3.94023	CTBS	chitobiase, di-N-acetyl-
79642	0.0032	0.218452	3.85734	ARSJ	arylsulfatase J
57402	0.033011	0.430688	3.83831	S100A14	S100 calcium binding protein A14
6715	0.0222413	0.38783	3.83239	SRD5A1	steroid-5-alpha-reductase, alpha polypeptide 1 (3-oxo-5 alpha-steroid delta 4-dehydrogenase alpha 1)
3685	5.86529e-09	0.00176965	3.78127	ITGAV	integrin, alpha V (vitronectin receptor, alpha polypeptide, antigen CD51)
151636	0.0175596	0.363458	3.77726	DTX3L	deltex 3-like (Drosophila)
5099	6.44236e-06	0.0244721	3.68768	PCDH7	BH-protocadherin (brain-heart)
29126	0.0142418	0.342701	3.67689	CD274	CD274 antigen
397	0.0362606	0.441251	3.55805	ARHGDIB	Rho GDP dissociation inhibitor (GDI) beta
5734	0.0110238	0.318416	3.49832	PTGER4	prostaglandin E receptor 4 (subtype EP4)
27063	0.00957159	0.305547	3.48743	ANKRD1	ankyrin repeat domain 1 (cardiac muscle)
6480	0.00256331	0.203493	3.4749	ST6GAL1	ST6 beta-galactosamide alpha-2,6-sialyltranferase 1
374	0.0186132	0.369374	3.47458	AREG	Amphiregulin (schwannoma-derived growth factor)
11343	0.00370363	0.228787	3.44317	MGLL	monoglyceride lipase
10602	0.0183973	0.368185	3.42865	CDC42EP3	CDC42 effector protein (Rho GTPase binding) 3
114907	8.37583e-06	0.0269712	3.42647	FBXO32	F-box protein 32
54855	0.0279565	0.412336	3.40841	FAM46C	family with sequence similarity 46, member C
85409	0.0226955	0.38996	3.39946	NKD2	naked cuticle homolog 2 (Drosophila)
91543	0.0377407	0.445793	3.37932	RSAD2	radical S-adenosyl methionine domain containing 2
28951	0.00798508	0.289589	3.30197	TRIB2	tribbles homolog 2 (Drosophila)
340061	0.000126702	0.0726703	3.29149	LOC340061	hypothetical protein LOC340061
57608	0.0195095	0.374194	3.2734	KIAA1462	KIAA1462
3673	0.0093996	0.303923	3.25631	ITGA2	integrin, alpha 2 (CD49B, alpha 2 subunit of VLA-2 receptor)
220	0.0201179	0.377362	3.19802	ALDH1A3	aldehyde dehydrogenase 1 family, member A3
284021	0.0115008	0.322348	3.19378	LOC284021	hypothetical protein LOC284021
236129_at	0.0114824	0.322199	3.18912	---	---
11221	0.0328209	0.430043	3.17007	DUSP10	dual specificity phosphatase 10
84910	1.23416e-06	0.0132225	3.16922	FLJ14681	Hypothetical protein FLJ14681
8613	0.0064794	0.271959	3.15315	PPAP2B	phosphatidic acid phosphatase type 2B
10384	0.00388666	0.232283	3.14783	BTN3A3	butyrophilin, subfamily 3, member A3
2907	0.0339089	0.433693	3.13139	GRINA	glutamate receptor, ionotropic, N-methyl D-asparate-associated protein 1 (glutamate binding)
4856	0.00850583	0.295082	3.09202	NOV	nephroblastoma overexpressed gene
140576	0.0410419	0.455392	3.03976	S100A16	S100 calcium binding protein A16
54478	0.0266945	0.407315	3.0272	FLJ10156	Family with sequence similarity 64, member A
1382	0.0232267	0.392407	3.02176	CRABP2	cellular retinoic acid binding protein 2
230127_at	0.0430729	0.460968	2.96523	---	Transcribed locus
151009	0.0465717	0.470055	2.96436	FLJ38359	hypothetical protein FLJ38359
230494_at	0.018553	0.369044	2.91005	---	---
226671_at	0.0259421	0.404225	2.9021	---	CDNA clone IMAGE:4797120
966	0.0460447	0.468726	2.9019	CD59	CD59 antigen p18-20 (antigen identified by monoclonal antibodies 16.3A5, EJ16, EJ30, EL32 and G344)
1362	1.53293e-05	0.0337155	2.89442	CPD	carboxypeptidase D
7503	0.000553535	0.122006	2.86593	XIST	X (inactive)-specific transcript
25791	0.0298218	0.419415	2.84875	NGEF	neuronal guanine nucleotide exchange factor
56937	0.0104443	0.313452	2.82577	TMEPAI	transmembrane, prostate androgen induced RNA
212812_at	0.0191662	0.37237	2.80917	---	CDNA: FLJ22642 fis, clone HSI06970
51141	0.018408	0.368244	2.80391	INSIG2	insulin induced gene 2
158852 /// 441519 /// 441520 /// 441521 /// 541465 /// 541466	0.00910899	0.301124	2.80343	CT45-2 /// CT45-3 /// CT45-4 /// CT45-5 /// CT45-6 /// CT45-1	cancer/testis antigen CT45-2 /// cancer/testis antigen CT45-3 /// cancer/testis antigen CT45-4 /// cancer/testis antigen CT45-5 /// cancer/testis antigen CT45-6 /// cancer/testis antigen CT45-1
146857	0.0168667	0.359406	2.76963	FLJ31952	likley ortholog of mouse schlafen 10
1565832_at	0.0028469	0.21046	2.74683	---	MRNA; cDNA DKFZp451J1819 (from clone DKFZp451J1819)
158158	0.0118782	0.325368	2.70313	RASEF	RAS and EF-hand domain containing
3667	0.00956348	0.305471	2.69219	IRS1	insulin receptor substrate 1
10379	0.0286104	0.414862	2.68874	ISGF3G	interferon-stimulated transcription factor 3, gamma 48kDa
11227	0.00191032	0.184984	2.68053	GALNT5	UDP-N-acetyl-alpha-D-galactosamine:polypeptide N-acetylgalactosaminyltransferase 5 (GalNAc-T5)
147463	0.00133429	0.16434	2.66921	ANKRD29	ankyrin repeat domain 29
116349	0.00543979	0.257835	2.66567	LOC116349	hypothetical protein BC014011
135228	0.00751031	0.284331	2.63714	CD109	CD109 antigen (Gov platelet alloantigens)
237435_at	0.0100761	0.310183	2.6343	---	Transcribed locus
57237	0.0306838	0.42256	2.61801	KIAA0500	KIAA0500 protein
83716	0.0162394	0.355617	2.59962	CRISPLD2	cysteine-rich secretory protein LCCL domain containing 2
3566	0.0303833	0.421472	2.59178	IL4R	interleukin 4 receptor
80830	0.0177917	0.364785	2.58735	APOL6	apolipoprotein L, 6
4233	0.0262722	0.40559	2.58704	MET	met proto-oncogene (hepatocyte growth factor receptor)
7464	0.0085395	0.295428	2.58503	CORO2A	coronin, actin binding protein, 2A
84985	3.63483e-05	0.0462717	2.58367	FAM83A	family with sequence similarity 83, member A
401166	0.018065	0.366331	2.58295	FLJ44896	FLJ44896 protein
79792	0.045793	0.468086	2.57424	GSDMDC1	gasdermin domain containing 1
50861	0.00443819	0.242119	2.55397	STMN3	Stathmin-like 3
93663	3.13849e-06	0.0187324	2.53791	ARHGAP18	Rho GTPase activating protein 18
6659	0.0108207	0.3167	2.52125	SOX4	SRY (sex determining region Y)-box 4
283131	6.99622e-07	0.0106919	2.51529	TncRNA	trophoblast-derived noncoding RNA
90853	0.00135951	0.165367	2.47811	SPOCD1	SPOC domain containing 1
5801	0.00199727	0.187691	2.47014	PTPRR	protein tyrosine phosphatase, receptor type, R
960	0.00270664	0.207082	2.46172	CD44	CD44 antigen (homing function and Indian blood group system)
85352	3.1461e-05	0.0438949	2.43043	KIAA1644	KIAA1644 protein
10135	0.0323291	0.428359	2.42325	PBEF1	pre-B-cell colony enhancing factor 1
10184	0.0423365	0.458973	2.40894	LHFPL2	lipoma HMGIC fusion partner-like 2
4638	0.0108572	0.31701	2.39795	MYLK	Myosin, light polypeptide kinase
27347	0.0266281	0.407045	2.39002	STK39	serine threonine kinase 39 (STE20/SPS1 homolog, yeast)
79098	0.00201676	0.188287	2.36719	C1orf116	chromosome 1 open reading frame 116
201895	3.49722e-05	0.0456245	2.36669	LOC201895	hypothetical protein LOC201895
51719	0.00317854	0.217986	2.36656	CAB39	calcium binding protein 39
1560869_a_at	0.0132748	0.335913	2.36476	---	Full length insert cDNA clone YQ50C11
90	0.0315478	0.425637	2.35502	ACVR1	activin A receptor, type I
114928	0.0163775	0.356461	2.33147	GPRASP2	G protein-coupled receptor associated sorting protein 2
26298	0.0435697	0.462297	2.33021	EHF	ets homologous factor
6196	0.00299465	0.213889	2.32922	RPS6KA2	ribosomal protein S6 kinase, 90kDa, polypeptide 2
229773_at	0.0441668	0.463877	2.32434	---	---
80328	0.0336058	0.432687	2.32056	ULBP2	UL16 binding protein 2
344558	0.00857484	0.29579	2.31911	SH3MD4	SH3 multiple domains 4
230778_at	0.00884659	0.298535	2.31303	---	Transcribed locus
57633	0.027272	0.409637	2.30806	LRRN1	leucine rich repeat neuronal 1
5357	0.0281333	0.413024	2.30288	PLS1	plastin 1 (I isoform)
80727	0.0173143	0.362038	2.30172	TTYH3	tweety homolog 3 (Drosophila)
54665	0.000104493	0.0678216	2.29134	RSBN1	round spermatid basic protein 1
4651	0.0368004	0.442926	2.28905	MYO10	Myosin X
64167	0.00098339	0.148384	2.27764	LRAP	leukocyte-derived arginine aminopeptidase
54885	0.0118994	0.325535	2.2591	FLJ20298	FLJ20298 protein
51347	0.0018946	0.184485	2.25788	TAOK3	TAO kinase 3
51088	0.000604583	0.12576	2.25388	KLHL5	kelch-like 5 (Drosophila)
25845	0.00981608	0.307818	2.2455	DKFZP564I1171	DKFZP564I1171 protein
3038	0.0449649	0.465959	2.2338	HAS3	hyaluronan synthase 3
56913	0.00012607	0.0725403	2.23	C1GALT1	core 1 synthase, glycoprotein-N-acetylgalactosamine 3-beta-galactosyltransferase, 1
9069	0.0196944	0.375165	2.21079	CLDN12	claudin 12
408	0.00261127	0.20471	2.20748	ARRB1	arrestin, beta 1
9	0.000140776	0.0754569	2.20718	NAT1	N-acetyltransferase 1 (arylamine N-acetyltransferase)
5791	0.0128511	0.332812	2.20437	PTPRE	protein tyrosine phosphatase, receptor type, E
130589	0.036161	0.44094	2.19511	GALM	Galactose mutarotase (aldose 1-epimerase)
1557849_at	0.028695	0.415185	2.19147	---	CDNA clone IMAGE:5267587
3920	0.00145576	0.169162	2.1837	LAMP2	lysosomal-associated membrane protein 2
3109	0.0107988	0.316514	2.17963	HLA-DMB	major histocompatibility complex, class II, DM beta /// major histocompatibility complex, class II, DM beta
7903	0.00996933	0.309218	2.16579	ST8SIA4	ST8 alpha-N-acetyl-neuraminide alpha-2,8-sialyltransferase 4
84246	0.0477139	0.472892	2.16533	TRG20	hypothetical protein MGC5309
2768	0.00127588	0.16191	2.15497	GNA12	guanine nucleotide binding protein (G protein) alpha 12
399687 /// 9220	0.0207751	0.380696	2.14589	TIAF1 /// MYO18A	TGFB1-induced anti-apoptotic factor 1 /// myosin XVIIIA
64135	0.0135503	0.337887	2.13923	IFIH1	interferon induced with helicase C domain 1
3597	0.0169357	0.359815	2.13636	IL13RA1	interleukin 13 receptor, alpha 1
237183_at	0.0444523	0.464625	2.12503	---	---
64080	0.00687006	0.276816	2.10983	RBKS	ribokinase
80008	0.0242592	0.397031	2.09932	FLJ23235	hypothetical protein FLJ23235
128434	0.0146907	0.345727	2.07838	C20orf102	chromosome 20 open reading frame 102
115201	0.018008	0.36601	2.07548	ATG4A	ATG4 autophagy related 4 homolog A (S. cerevisiae)
51337	0.0276909	0.411295	2.07184	C8orf55	chromosome 8 open reading frame 55
56895	0.00213168	0.191713	2.06139	AGPAT4	1-acylglycerol-3-phosphate O-acyltransferase 4 (lysophosphatidic acid acyltransferase, delta)
1519	0.0495604	0.477354	2.06056	CTSO	cathepsin O
56261	0.0062753	0.269331	2.04277	KIAA1434	hypothetical protein KIAA1434
285596 /// 389347	0.0452793	0.466771	2.04214	NY-REN-7 /// LOC389347	NY-REN-7 antigen /// similar to KIAA0752 protein
9915	0.0232784	0.392642	2.03766	ARNT2	Aryl-hydrocarbon receptor nuclear translocator 2
3459	0.0147322	0.346002	2.03719	IFNGR1	Interferon gamma receptor 1
231403_at	0.0195916	0.374626	2.03129	---	---
1992	0.0312427	0.424559	2.03092	SERPINB1	serpin peptidase inhibitor, clade B (ovalbumin), member 1
4286	0.0357068	0.43951	2.02953	MITF	microphthalmia-associated transcription factor
83641	0.0048788	0.249333	2.02872	C10orf45	chromosome 10 open reading frame 45
8915	0.00306821	0.21555	2.02515	BCL10	B-cell CLL/lymphoma 10
54800	0.00896514	0.299712	2.02398	KLHL24	kelch-like 24 (Drosophila)
56900	0.0144441	0.344074	2.01827	C1orf119	chromosome 1 open reading frame 119

## Sheet: lower in EGFR_mutant_cell_lines
Supplementary File 1B. Genes Expressed at Lower Levels in EGFR Mutant Cell Lines than in EGFR-Wild-Type Cell Lines.
Entrez.Gene	Pvalue	FDR	Fold change: Mut/WT	Gene.Symbol	Gene.Title
1290	0.0152961	0.34969	0.0909268	COL5A2	collagen, type V, alpha 2
57110	0.0470761	0.471315	0.129976	HRASLS	HRAS-like suppressor
1565799_at	0.0182492	0.367362	0.139069	---	Glioma amplified sequence 64
122060	0.0184737	0.368607	0.139847	FLJ30046	hypothetical protein FLJ30046
27164	0.0217042	0.385263	0.16565	SALL3	Sal-like 3 (Drosophila)
227623_at	0.00158494	0.173983	0.194414	---	MRNA; cDNA DKFZp313C0240 (from clone DKFZp313C0240)
1746	0.0123769	0.329242	0.205385	DLX2	distal-less homeo box 2
9355	0.00466322	0.245868	0.217949	LHX2	LIM homeobox 2
51299	0.0187727	0.370246	0.219302	NRN1	neuritin 1
59336	0.0445935	0.464994	0.227328	PRDM13	PR domain containing 13
235753_at	0.0179849	0.36588	0.258596	---	---
256227	0.0400302	0.452524	0.260728	MGC87042	similar to Six transmembrane epithelial antigen of prostate
79070	0.000245208	0.0918712	0.266038	KDELC1	KDEL (Lys-Asp-Glu-Leu) containing 1
359845	0.0387156	0.448701	0.277536	MGC45871	hypothetical protein MGC45871
57291	0.0389109	0.449276	0.292786	KIAA0114	KIAA0114 gene product
4507	0.0254433	0.402135	0.295831	MTAP	methylthioadenosine phosphorylase
1556194_a_at	0.0150239	0.347924	0.300459	---	CDNA clone IMAGE:5285801
238007_at	0.0426827	0.459915	0.339704	---	Transcribed locus, strongly similar to NP_002851.2 pyrroline-5-carboxylate synthetase; Pyrroline-5-carboxlate synthetase; pyrroline-5-carboxylate synthetase (glutamate gamma-semialdehyde synthetase) [Homo sapiens]
26049	0.027389	0.410102	0.363138	KIAA0888	KIAA0888 protein
55378	0.0366066	0.442327	0.365676	PRO1843	hypothetical protein PRO1843
26223	0.0404658	0.453766	0.372261	FBXL21	F-box and leucine-rich repeat protein 21
133	0.0141168	0.341845	0.375009	ADM	adrenomedullin
401466	0.0158222	0.353031	0.395547	C8orf59	chromosome 8 open reading frame 59
10360	0.0495953	0.477437	0.415022	NPM3	nucleophosmin/nucleoplasmin, 3
5226	0.0313465	0.424927	0.417344	PGD	phosphogluconate dehydrogenase /// phosphogluconate dehydrogenase
123722	0.0412731	0.456038	0.423989	LOC123722	Hypothetical protein LOC123722
548320 /// 548321 /// 548323	0.0335579	0.432527	0.428772	FAM27C /// FAM27A /// FAM27B	family with sequence similarity 27, member C /// family with sequence similarity 27, member A /// family with sequence similarity 27, member B
51434	0.0290974	0.416712	0.431641	ANAPC7	anaphase promoting complex subunit 7
2235	0.00621975	0.268605	0.438368	FECH	ferrochelatase (protoporphyria)
207737_at	0.0107732	0.316296	0.442006	---	---
11132	0.046817	0.470669	0.455108	CAPN10	calpain 10
3837	0.00250023	0.201867	0.457574	KPNB1	Karyopherin (importin) beta 1
831	0.00469319	0.246357	0.461925	CAST	calpastatin
55605	0.0197818	0.375622	0.471936	KIF21A	kinesin family member 21A
5140	0.0187402	0.370068	0.47195	PDE3B	phosphodiesterase 3B, cGMP-inhibited
64714	0.0277059	0.411354	0.473084	PDIA2	protein disulfide isomerase family A, member 2
83700	0.0248666	0.399675	0.489089	JAM3	junctional adhesion molecule 3
387640	0.00734763	0.282471	0.498909	FLJ45187	FLJ45187 protein
